# Supplementary material
Source: publisher site journal article supplement (https://www.degruyterbrill.com/publication/isbn/9783805912358/downloadAsset/9783805912358_Inhaltsverzeichnis.pdf)
Supplement: Supplementary file 1 [file 9783805912358_Inhaltsverzeichnis.pdf]

# Inhaltsübersicht

|                                              | Seite <sup>*</sup> |
|----------------------------------------------|--------------------|
| Buch 4 · Familienrecht                       |                    |
| Abschnitt 1 · Bürgerliche Ehe                |                    |
| Titel 6 · Eheliches Güterrecht _____         | 1                  |
| Untertitel 1 · Gesetzliches Güterrecht _____ | 18                 |
| Sachregister _____                           | 399                |

---

\* Zitiert wird nicht nach Seiten, sondern nach Paragraph bzw Artikel und Randnummer; siehe dazu auch „Zitierweise“.
